# Supplementary material for: Pain descriptors of taxane acute pain syndrome (TAPS) in breast cancer patients—a prospective clinical study
Source: Springer Nature journal article supplement (doi:10.1007/s00520-019-04845-7), 2019-05-17
Supplement: MOESM1 [file 16731518]

# Appendix A1. Comparing pain descriptors for joint and muscle pain during the acute phase.

| **Pain Descriptor** |  | **Joint Pain, N (%)** | **Muscle Pain, N (%)** | **p-value** |
| --- | --- | --- | --- | --- |
| ***At Cycle 1*** |  |  |  |  |
| Aching | No | 73 (39.9) | 66 (36.1) | 0.5182 |
|  | Yes | 110 (60.1) | 117 (63.9) | . |
| Annoying | No | 127 (69.4) | 121 (66.1) | 0.5761 |
|  | Yes | 56 (30.6) | 62 (33.9) | . |
| Burning | No | 157 (85.8) | 153 (83.6) | 0.6634 |
|  | Yes | 26 (14.2) | 30 (16.4) | . |
| Cold | No | 178 (97.3) | 175 (95.6) | 0.5740 |
|  | Yes | 5 (2.7) | 8 (4.4) | . |
| Constant | No | 128 (69.9) | 122 (66.7) | 0.5744 |
|  | Yes | 55 (30.1) | 61 (33.3) | . |
| Dull | No | 151 (82.5) | 152 (83.1) | 0.8899 |
|  | Yes | 32 (17.5) | 31 (16.9) | . |
| Exhausted | No | 126 (68.9) | 121 (66.1) | 0.6554 |
|  | Yes | 57 (31.1) | 62 (33.9) | . |
| Gnawing | No | 154 (84.2) | 156 (85.2) | 0.8847 |
|  | Yes | 29 (15.8) | 27 (14.8) | . |
| Nagging | No | 126 (68.9) | 128 (69.9) | 0.9097 |
|  | Yes | 57 (31.1) | 55 (30.1) | . |
| Numb | No | 165 (90.2) | 158 (86.3) | 0.3301 |
|  | Yes | 18 (9.8) | 25 (13.7) | . |
| Penetrating | No | 137 (74.9) | 137 (74.9) | 0.9999 |
|  | Yes | 46 (25.1) | 46 (25.1) | . |
| Radiating | No | 152 (83.1) | 148 (80.9) | 0.6836 |
|  | Yes | 31 (16.9) | 35 (19.1) | . |
| Rhythmic | No | 165 (90.2) | 165 (90.2) | 0.9999 |
|  | Yes | 18 (9.8) | 18 (9.8) | . |
| Sharp | No | 140 (76.5) | 145 (79.2) | 0.6147 |
|  | Yes | 43 (23.5) | 38 (20.8) | . |
| Shooting | No | 134 (73.2) | 137 (74.9) | 0.8116 |
|  | Yes | 49 (26.8) | 46 (25.1) | . |
| Stabbing | No | 125 (68.3) | 138 (75.4) | 0.1629 |
|  | Yes | 58 (31.7) | 45 (24.6) | . |
| Tender | No | 135 (73.8) | 123 (67.2) | 0.2073 |
|  | Yes | 48 (26.2) | 60 (32.8) | . |
| Throbbing | No | 115 (62.8) | 122 (66.7) | 0.5116 |
|  | Yes | 68 (37.2) | 61 (33.3) | . |
| Tingling | No | 164 (89.6) | 159 (86.9) | 0.5165 |
|  | Yes | 19 (10.4) | 24 (13.1) | . |
| Tiring | No | 112 (61.2) | 106 (57.9) | 0.5944 |
|  | Yes | 71 (38.8) | 77 (42.1) | . |
| Unbearable | No | 148 (80.9) | 155 (84.7) | 0.4062 |
|  | Yes | 35 (19.1) | 28 (15.3) |  |
| ***At Cycle 2*** |  |  |  |  |
| Aching | No | 85 (49.7) | 85 (49.7) | 0.9999 |
|  | Yes | 86 (50.3) | 86 (50.3) | . |
| Annoying | No | 128 (74.9) | 131 (76.6) | 0.8009 |
|  | Yes | 43 (25.1) | 40 (23.4) | . |
| Burning | No | 157 (91.8) | 157 (91.8) | 0.9999 |
|  | Yes | 14 (8.2) | 14 (8.2) | . |
| Cold | No | 165 (96.5) | 166 (97.1) | 0.7592 |
|  | Yes | 6 (3.5) | 5 (2.9) | . |
| Constant | No | 139 (81.3) | 137 (80.1) | 0.8911 |
|  | Yes | 32 (18.7) | 34 (19.9) | . |
| Dull | No | 149 (87.1) | 140 (81.9) | 0.2317 |
|  | Yes | 22 (12.9) | 31 (18.1) | . |
| Exhausted | No | 136 (79.5) | 133 (77.8) | 0.7920 |
|  | Yes | 35 (20.5) | 38 (22.2) | . |
| Gnawing | No | 151 (88.3) | 150 (87.7) | 0.8678 |
|  | Yes | 20 (11.7) | 21 (12.3) | . |
| Nagging | No | 129 (75.4) | 133 (77.8) | 0.7017 |
|  | Yes | 42 (24.6) | 38 (22.2) | . |
| Numb | No | 158 (92.4) | 145 (84.8) | 0.0401 |
|  | Yes | 13 (7.6) | 26 (15.2) | . |
| Penetrating | No | 143 (83.6) | 143 (83.6) | 0.9999 |
|  | Yes | 28 (16.4) | 28 (16.4) | . |
| Radiating | No | 144 (84.2) | 147 (86.0) | 0.7617 |
|  | Yes | 27 (15.8) | 24 (14.0) | . |
| Rhythmic | No | 163 (95.3) | 161 (94.2) | 0.8095 |
|  | Yes | 8 (4.7) | 10 (5.8) | . |
| Sharp | No | 138 (80.7) | 138 (80.7) | 0.9999 |
|  | Yes | 33 (19.3) | 33 (19.3) | . |
| Shooting | No | 137 (80.1) | 140 (81.9) | 0.7830 |
|  | Yes | 34 (19.9) | 31 (18.1) | . |
| Stabbing | No | 135 (78.9) | 143 (83.6) | 0.3318 |
|  | Yes | 36 (21.1) | 28 (16.4) | . |
| Tender | No | 133 (77.8) | 128 (74.9) | 0.6111 |
|  | Yes | 38 (22.2) | 43 (25.1) | . |
| Throbbing | No | 132 (77.2) | 131 (76.6) | 0.8979 |
|  | Yes | 39 (22.8) | 40 (23.4) | . |
| Tingling | No | 161 (94.2) | 154 (90.1) | 0.2284 |
|  | Yes | 10 (5.8) | 17 (9.9) | . |
| Tiring | No | 122 (71.3) | 110 (64.3) | 0.2028 |
|  | Yes | 49 (28.7) | 61 (35.7) | . |
| Unbearable | No | 165 (96.5) | 163 (95.3) | 0.7861 |
|  | Yes | 6 (3.5) | 8 (4.7) |  |
| ***At Cycle 3*** |  |  |  |  |
| Aching | No | 78 (52.3) | 72 (48.3) | 0.5625 |
|  | Yes | 71 (47.7) | 77 (51.7) | . |
| Annoying | No | 115 (77.2) | 113 (75.8) | 0.8914 |
|  | Yes | 34 (22.8) | 36 (24.2) | . |
| Burning | No | 132 (88.6) | 127 (85.2) | 0.4925 |
|  | Yes | 17 (11.4) | 22 (14.8) | . |
| Cold | No | 145 (97.3) | 145 (97.3) | 0.9999 |
|  | Yes | 4 (2.7) | 4 (2.7) | . |
| Constant | No | 125 (83.9) | 116 (77.9) | 0.2385 |
|  | Yes | 24 (16.1) | 33 (22.1) | . |
| Dull | No | 133 (89.3) | 133 (89.3) | 0.9999 |
|  | Yes | 16 (10.7) | 16 (10.7) | . |
| Exhausted | No | 121 (81.2) | 110 (73.8) | 0.1650 |
|  | Yes | 28 (18.8) | 39 (26.2) | . |
| Gnawing | No | 133 (89.3) | 124 (83.2) | 0.1780 |
|  | Yes | 16 (10.7) | 25 (16.8) | . |
| Nagging | No | 115 (77.2) | 114 (76.5) | 0.8908 |
|  | Yes | 34 (22.8) | 35 (23.5) | . |
| Numb | No | 137 (91.9) | 134 (89.9) | 0.6872 |
|  | Yes | 12 (8.1) | 15 (10.1) | . |
| Penetrating | No | 125 (83.9) | 123 (82.6) | 0.8769 |
|  | Yes | 24 (16.1) | 26 (17.4) | . |
| Radiating | No | 130 (87.2) | 122 (81.9) | 0.2616 |
|  | Yes | 19 (12.8) | 27 (18.1) | . |
| Rhythmic | No | 141 (94.6) | 138 (92.6) | 0.6365 |
|  | Yes | 8 (5.4) | 11 (7.4) | . |
| Sharp | No | 122 (81.9) | 124 (83.2) | 0.8788 |
|  | Yes | 27 (18.1) | 25 (16.8) | . |
| Shooting | No | 115 (77.2) | 118 (79.2) | 0.7792 |
|  | Yes | 34 (22.8) | 31 (20.8) | . |
| Stabbing | No | 117 (78.5) | 128 (85.9) | 0.1293 |
|  | Yes | 32 (21.5) | 21 (14.1) | . |
| Tender | No | 121 (81.2) | 116 (77.9) | 0.5660 |
|  | Yes | 28 (18.8) | 33 (22.1) | . |
| Throbbing | No | 114 (76.5) | 110 (73.8) | 0.6877 |
|  | Yes | 35 (23.5) | 39 (26.2) | . |
| Tingling | No | 132 (88.6) | 125 (83.9) | 0.3130 |
|  | Yes | 17 (11.4) | 24 (16.1) | . |
| Tiring | No | 115 (77.2) | 103 (69.1) | 0.1502 |
|  | Yes | 34 (22.8) | 46 (30.9) | . |
| Unbearable | No | 143 (96.0) | 141 (94.6) | 0.7854 |
|  | Yes | 6 (4.0) | 8 (5.4) |  |

# Appendix A2. Comparing pain descriptions/locations between joint pain and muscle pain during the delayed phase

| **Pain Descriptor** |  | **Joint Pain, N (%)** | **Muscle Pain, N (%)** | **p-value** |
| --- | --- | --- | --- | --- |
| ***At Month 1*** |  |  |  |  |
| Aching | No | 96 (73.3) | 86 (65.6) | 0.2272 |
|  | Yes | 35 (26.7) | 45 (34.4) | . |
| Annoying | No | 101 (77.1) | 92 (70.2) | 0.8200 |
|  | Yes | 30 (22.9) | 39 (29.8) | . |
| Burning | No | 126 (96.2) | 120 (91.6) | 0.2442 |
|  | Yes | 5 (3.8) | 11 (8.4) | . |
| Exhausted | No | 112 (85.5) | 101 (77.1) | 0.8078 |
|  | Yes | 19 (14.5) | 30 (22.9) | . |
| Gnawing | No | 124 (94.7) | 118 (90.1) | 0.1958 |
|  | Yes | 7 (5.3) | 13 (9.9) | . |
| Numb | No | 121 (92.4) | 123 (93.9) | 0.0679 |
|  | Yes | 10 (7.6) | 8 (6.1) | . |
| Radiating | No | 121 (92.4) | 117 (89.3) | 0.5213 |
|  | Yes | 10 (7.6) | 14 (10.7) | . |
| Sharp | No | 116 (88.5) | 119 (90.8) | 0.1125 |
|  | Yes | 15 (11.5) | 12 (9.2) | . |
| Throbbing | No | 120 (91.6) | 121 (92.4) | 0.2617 |
|  | Yes | 11 (8.4) | 10 (7.6) | . |
| Tingling | No | 126 (96.2) | 122 (93.1) | 0.6851 |
|  | Yes | 5 (3.8) | 9 (6.9) | . |
| ***At Month 3*** |  |  |  |  |
| Aching | No | 66 (64.7) | 77 (75.5) | 0.1258 |
|  | Yes | 36 (35.3) | 25 (24.5) | . |
| Annoying | No | 69 (67.6) | 75 (73.5) | 0.8178 |
|  | Yes | 33 (32.4) | 27 (26.5) | . |
| Burning | No | 95 (93.1) | 93 (91.2) | 0.8000 |
|  | Yes | 7 (6.9) | 9 (8.8) | . |
| Exhausted | No | 83 (81.4) | 85 (83.3) | 0.8058 |
|  | Yes | 19 (18.6) | 17 (16.7) | . |
| Gnawing | No | 93 (91.2) | 94 (92.2) | 0.7955 |
|  | Yes | 9 (8.8) | 8 (7.8) | . |
| Numb | No | 94 (92.2) | 92 (90.2) | 0.7477 |
|  | Yes | 8 (7.8) | 10 (9.8) | . |
| Radiating | No | 90 (88.2) | 92 (90.2) | 0.8220 |
|  | Yes | 12 (11.8) | 10 (9.8) | . |
| Sharp | No | 86 (84.3) | 92 (90.2) | 0.8545 |
|  | Yes | 16 (15.7) | 10 (9.8) | . |
| Throbbing | No | 92 (90.2) | 91 (89.2) | 0.4425 |
|  | Yes | 10 (9.8) | 11 (10.8) | . |
| Tingling | No | 99 (97.1) | 96 (94.1) | 0.2938 |
|  | Yes | 3 (2.9) | 6 (5.9) | . |
| ***At Month 6*** |  |  |  |  |
| Aching | No | 64 (69.6) | 74 (80.4) | 0.1249 |
|  | Yes | 28 (30.4) | 18 (19.6) | . |
| Annoying | No | 67 (72.8) | 73 (79.3) | 0.9999 |
|  | Yes | 25 (27.2) | 19 (20.7) | . |
| Burning | No | 91 (98.9) | 90 (97.8) | 0.7945 |
|  | Yes | 1 (1.1) | 2 (2.2) | . |
| Exhausted | No | 76 (82.6) | 78 (84.8) | 0.5667 |
|  | Yes | 16 (17.4) | 14 (15.2) | . |
| Gnawing | No | 83 (90.2) | 85 (92.4) | 0.5605 |
|  | Yes | 9 (9.8) | 7 (7.6) | . |
| Numb | No | 87 (94.6) | 84 (91.3) | 0.2122 |
|  | Yes | 5 (5.4) | 8 (8.7) | . |
| Radiating | No | 83 (90.2) | 82 (89.1) | 0.8086 |
|  | Yes | 9 (9.8) | 10 (10.9) | . |
| Sharp | No | 82 (89.1) | 84 (91.3) | 0.8421 |
|  | Yes | 10 (10.9) | 8 (8.7) | . |
| Throbbing | No | 83 (90.2) | 83 (90.2) | 0.3877 |
|  | Yes | 9 (9.8) | 9 (9.8) | . |
| Tingling | No | 86 (93.5) | 82 (89.1) | 0.8048 |
|  | Yes | 6 (6.5) | 10 (10.9) | . |
| ***At Month 9*** |  |  |  |  |
| Aching | No | 49 (57.0) | 66 (76.7) | 0.0092 |
|  | Yes | 37 (43.0) | 20 (23.3) | . |
| Annoying | No | 58 (67.4) | 65 (75.6) | 0.3519 |
|  | Yes | 28 (32.6) | 21 (24.4) | . |
| Burning | No | 81 (94.2) | 82 (95.3) | 0.9999 |
|  | Yes | 5 (5.8) | 4 (4.7) | . |
| Exhausted | No | 68 (79.1) | 69 (80.2) | 0.9999 |
|  | Yes | 18 (20.9) | 17 (19.8) | . |
| Gnawing | No | 77 (89.5) | 77 (89.5) | 0.7320 |
|  | Yes | 9 (10.5) | 9 (10.5) | . |
| Numb | No | 81 (94.2) | 81 (94.2) | 0.1173 |
|  | Yes | 5 (5.8) | 5 (5.8) | . |
| Radiating | No | 74 (86.0) | 76 (88.4) | 0.8199 |
|  | Yes | 12 (14.0) | 10 (11.6) | . |
| Sharp | No | 69 (80.2) | 73 (84.9) | 0.8498 |
|  | Yes | 17 (19.8) | 13 (15.1) | . |
| Throbbing | No | 73 (84.9) | 78 (90.7) | 0.3108 |
|  | Yes | 13 (15.1) | 8 (9.3) | . |
| Tingling | No | 78 (90.7) | 79 (91.9) | 0.5472 |
|  | Yes | 8 (9.3) | 7 (8.1) | . |
| ***At Month 12*** |  |  |  |  |
| Aching | No | 47 (61.8) | 56 (73.7) | 0.1647 |
|  | Yes | 29 (38.2) | 20 (26.3) | . |
| Annoying | No | 53 (69.7) | 53 (69.7) | 0.8110 |
|  | Yes | 23 (30.3) | 23 (30.3) | . |
| Burning | No | 67 (88.2) | 64 (84.2) | 0.6248 |
|  | Yes | 9 (11.8) | 12 (15.8) | . |
| Exhausted | No | 66 (86.8) | 64 (84.2) | 0.7924 |
|  | Yes | 10 (13.2) | 12 (15.8) | . |
| Gnawing | No | 65 (85.5) | 68 (89.5) | 0.6391 |
|  | Yes | 11 (14.5) | 8 (10.5) | . |
| Numb | No | 69 (90.8) | 67 (88.2) | 0.9999 |
|  | Yes | 7 (9.2) | 9 (11.8) | . |
| Radiating | No | 69 (90.8) | 66 (86.8) | 0.6079 |
|  | Yes | 7 (9.2) | 10 (13.2) | . |
| Sharp | No | 58 (76.3) | 64 (84.2) | 0.8182 |
|  | Yes | 18 (23.7) | 12 (15.8) | . |
| Throbbing | No | 67 (88.2) | 65 (85.5) | 0.9999 |
|  | Yes | 9 (11.8) | 11 (14.5) | . |
| Tingling | No | 70 (92.1) | 69 (90.8) | 0.3082 |
|  | Yes | 6 (7.9) | 7 (9.2) | . |

# Appendix B: Comparison of pain during taxane cycles was predictive of chronic pain.

| **Pain during  long-term follow-up** | **Pain on Day 14 of Cycle 1** | |  | **Pain on Day 21 of Cycle 1** | |
| --- | --- | --- | --- | --- | --- |
| **No** | **Yes** |  | **No** | **Yes** |
| **Pain at Month 1** |  |  |  |  |  |
| No | 58 (68.2%) | 14 (46.7%) |  | 61 (64.9%) | 7 (43.8%) |
| Yes | 27 (31.8%) | 16 (53.3%) |  | 33 (35.1%) | 9 (56.3%) |
| Odds Ratio (OR) | 2.42  *0.0406* | |  | 2.33  0.1172 | |
| p value |  |
| 95% CI of OR | 1.049 - 5.667 | |  | 0.819 - 6.828 | |
| **Pain at Month 3** |  |  |  |  |  |
| No | 46 (73%) | 13 (52%) |  | 55 (78.6%) | 3 (23.1%) |
| Yes | 17 (27%) | 12 (48%) |  | 15 (21.4%) | 10 (76.9%) |
| Odds Ratio (OR) | 2.46  0.0656 | |  | 10.74  *0.0006* | |
| p value |  |
| 95% CI of OR | 0.955 - 6.405 | |  | 3.057 - 47.071 | |
| **Pain at Month 6** |  |  |  |  |  |
| No | 45 (79%) | 17 (73.9%) |  | 49 (79%) | 8 (61.5%) |
| Yes | 12 (21.1%) | 6 (26.1%) |  | 13 (21%) | 5 (38.5%) |
| Odds Ratio (OR) | 1.35  0.5980 | |  | 2.37  0.1773 | |
| p value |  |
| 95% CI of OR | 0.432 - 3.979 | |  | 0.663 - 8.076 | |
| **Pain at Month 9** |  |  |  |  |  |
| No | 39 (70.9%) | 11 (57.9%) |  | 42 (70%) | 5 (50%) |
| Yes | 16 (29.1%) | 8 (42.1%) |  | 18 (30%) | 5 (50%) |
| Odds Ratio (OR) | 1.77  0.2976 | |  | 2.3  0.2179 | |
| p value |  |
| 95% CI of OR | 0.604 - 5.101 | |  | 0.610 - 8.701 | |
| **Pain at Month 12** |  |  |  |  |  |
| No | 33 (73.3%) | 11 (55%) |  | 37 (72.6%) | 4 (40%) |
| Yes | 12 (26.7%) | 9 (45%) |  | 14 (27.5%) | 6 (60%) |
| Odds Ratio (OR) | 2.21  0.1557 | |  | 3.74  0.0594 | |
| p value |  |
| 95% CI of OR | 0.750 - 6.585 | |  | 0.986 - 15.380 | |

| **Pain during  long-term follow-up** | **Pain on Day 14 of Cycle 2** | |  | **Pain on Day 21 of Cycle 2** | |
| --- | --- | --- | --- | --- | --- |
| **No** | **Yes** |  | **No** | **Yes** |
| **Pain at Month 1** |  |  |  |  |  |
| No | 56 (72.7%) | 11 (33.3%) |  | 56 (68.3%) | 11 (39.3%) |
| Yes | 21 (27.3%) | 22 (66.7%) |  | 26 (31.7%) | 17 (60.7%) |
| Odds Ratio (OR) | 5.14  *0.0002* | |  | 3.25  *0.0090* | |
| p value |  |
| 95% CI of OR | 2.204 - 12.599 | |  | 1.368 - 7.970 | |
| **Pain at Month 3** |  |  |  |  |  |
| No | 45 (81.8%) | 12 (42.9%) |  | 49 (80.3%) | 8 (36.4%) |
| Yes | 10 (18.2%) | 16 (57.1%) |  | 12 (19.7%) | 14 (63.6%) |
| Odds Ratio (OR) | 5.72  *0.0007* | |  | 6.76  *0.0004* | |
| p value |  |
| 95% CI of OR | 2.161 - 16.015 | |  | 2.427 - 20.123 | |
| **Pain at Month 6** |  |  |  |  |  |
| No | 42 (85.7%) | 18 (69.2%) |  | 47 (87%) | 13 (61.9%) |
| Yes | 7 (14.3%) | 8 (30.8%) |  | 7 (13%) | 8 (38.1%) |
| Odds Ratio (OR) | 2.6  0.1041 | |  | 4  *0.0220* | |
| p value |  |
| 95% CI of OR | 0.845 - 8.220 | |  | 1.263 - 13.014 | |
| **Pain at Month 9** |  |  |  |  |  |
| No | 37 (78.7%) | 10 (43.5%) |  | 39 (76.5%) | 8 (42.1%) |
| Yes | 10 (21.3%) | 13 (56.5%) |  | 12 (23.5%) | 11 (57.9%) |
| Odds Ratio (OR) | 4.59  *0.0055* | |  | 4.3  *0.0102* | |
| p value |  |
| 95% CI of OR | 1.625 - 13.675 | |  | 1.459 - 13.172 | |
| **Pain at Month 12** |  |  |  |  |  |
| No | 32 (78.1%) | 8 (40%) |  | 35 (81.4%) | 5 (27.8%) |
| Yes | 9 (22%) | 12 (60%) |  | 8 (18.6%) | 13 (72.2%) |
| Odds Ratio (OR) | 5.03  *0.0060* | |  | 10.25  *0.0003* | |
| p value |  |
| 95% CI of OR | 1.663 - 16.289 | |  | 3.119 - 38.422 | |

| **Pain during  long-term follow-up** | **Pain on Day 14 of Cycle 3** | |  | **Pain on Day 21 of Cycle 3** | |
| --- | --- | --- | --- | --- | --- |
| **No** | **Yes** |  | **No** | **Yes** |
| **Pain at Month 1** |  |  |  |  |  |
| No | 50 (76.9%) | 10 (31.3%) |  | 50 (78.1%) | 8 (28.6%) |
| Yes | 15 (23.1%) | 22 (68.8%) |  | 14 (21.9%) | 20 (71.4%) |
| Odds Ratio (OR) | 6.98  *<.0001* | |  | 8.4  *<.0001* | |
| p value |  |
| 95% CI of OR | 2.834 - 18.309 | |  | 3.226 – 23.7 | |
| **Pain at Month 3** |  |  |  |  |  |
| No | 43 (84.3%) | 7 (29.2%) |  | 44 (86.3%) | 5 (25%) |
| Yes | 8 (15.7%) | 17 (70.8%) |  | 7 (13.7%) | 15 (75%) |
| Odds Ratio (OR) | 11.94  *<.0001* | |  | 16.72  *<.0001* | |
| p value |  |
| 95% CI of OR | 4.046 - 39.280 | |  | 5.132 - 63.223 | |
| **Pain at Month 6** |  |  |  |  |  |
| No | 41 (91.1%) | 13 (59.1%) |  | 40 (88.9%) | 12 (63.2%) |
| Yes | 4 (8.9%) | 9 (40.9%) |  | 5 (11.1%) | 7 (36.8%) |
| Odds Ratio (OR) | 6.49  *0.0054* | |  | 4.42  *0.0265* | |
| p value |  |
| 95% CI of OR | 1.890 - 25.496 | |  | 1.257 - 16.571 | |
| **Pain at Month 9** |  |  |  |  |  |
| No | 35 (83.3%) | 6 (31.6%) |  | 34 (82.9%) | 6 (37.5%) |
| Yes | 7 (16.7%) | 13 (68.4%) |  | 7 (17.1%) | 10 (62.5%) |
| Odds Ratio (OR) | 9.83  *0.0003* | |  | 7.43  *0.0022* | |
| p value |  |
| 95% CI of OR | 3.033 - 35.806 | |  | 2.193 - 27.791 | |
| **Pain at Month 12** |  |  |  |  |  |
| No | 30 (79%) | 6 (35.3%) |  | 29 (80.6%) | 5 (31.3%) |
| Yes | 8 (21.1%) | 11 (64.7%) |  | 7 (19.4%) | 11 (68.8%) |
| Odds Ratio (OR) | 6.35  *0.0038* | |  | 8.22  *0.0018* | |
| p value |  |
| 95% CI of OR | 1.931 - 22.954 | |  | 2.367 - 32.390 | |
